# Supplementary material for: Millimeter-sized Mg–Al-LDH nanoflake impregnated magnetic alginate beads (LDH-n-MABs): a novel bio-based sorbent for the removal of fluoride in water
Source: Royal Society of Chemistry journal article supplement (doi:10.1039/c3ta13526h), 2013-10-26
Supplement: c3ta13526h.pdf [file c3ta13526h.pdf]

## Supporting Information

### Millimeter-sized Mg-Al-LDHs nanoflakes impregnated magnetic alginate beads

#### (LDHs-n-MABs): A novel bio-based sorbent for removal of fluoride in water

Chao Gao<sup>†,‡,§</sup>, Xin-Yao Yu<sup>‡,§</sup>, Tao Luo<sup>‡</sup>, Yong Jia<sup>‡</sup>, Bai Sun<sup>‡</sup>, Jin-Huai Liu<sup>‡</sup>, and  
Xing-Jiu Huang<sup>\*,†,‡</sup>

<sup>†</sup>Department of Chemistry, University of Science and Technology of China, Hefei,  
230026, P.R. China.

<sup>‡</sup>Nano-materials and Environmental Detection Laboratory, Hefei Institute of Physical  
Sciences, Chinese Academy of Sciences, Hefei, 230031, P.R. China.

<sup>§</sup>These two authors contributed equally to this work.

\*Address correspondence to X.-J. Huang

E-mail: [xingjiuhuang@iim.ac.cn](mailto:xingjiuhuang@iim.ac.cn) (X.J.H)

Tel.: +86-551-5591142; fax: +86-551-5592420.

**Adsorption capacity:**

Adsorption capacity was calculated from the relationship:

$$q_e = \frac{(C_0 - C_e) V}{m} \quad (1)$$

Where  $q_e$  (mg/g) is the equilibrium adsorption capacity,  $C_0$  and  $C_e$  represent the initial and equilibrium  $F^-$  concentrations (ppm),  $V$  (L) is the volume of solution and  $m$  (g) is the weight of the adsorbent.

**Adsorption isotherms:**

The Langmuir isotherm assumes a surface with homogeneous binding sites, equivalent adsorption energies, and no interaction between adsorbed species.

The Langmuir adsorption isotherm can be represented in linear form as follows:

$$\frac{C_e}{q_e} = \frac{1}{q_m K_L} + \frac{C_e}{q_m} \quad (2)$$

where  $q_m$  and  $K_L$  are Langmuir constants, representing the maximum adsorption capacity of adsorbents (mg/g) and the energy of adsorption, respectively. The values of  $q_m$  and  $K_L$  can be calculated from the slope and intercept of plots of  $\frac{C_e}{q_e}$  versus  $C_e$ .

Freundlich isotherm is based on an exponential distribution of adsorption sites and energies. It is derived to model multilayer adsorption and adsorption onto heterogeneous surfaces. The linear form of Freundlich adsorption model is as follows:

$$\ln q_e = \frac{1}{n} \ln C_e + \ln K_F \quad (3)$$

Where  $K_F$  and  $n$  are Freundlich constants related to adsorption capacity and adsorption intensity, respectively. The values of  $n$  and  $K_F$  can be obtained by a plot of  $\ln q_e$  against  $\ln C_e$ .

Temkin isotherm takes into account the adsorbing species-adsorbent interactions.

The linearized form of the Temkin isotherm is:

$$q_e = B_1 \ln K_T + B_1 \ln C_e \quad (4)$$

Where  $B_1 = RT/b$ ,  $T$  is the absolute temperature in K,  $R$  the universal gas constant,  $8.314 \text{ J mol}^{-1} \text{ K}^{-1}$ ,  $K_T$  the equilibrium binding constant ( $\text{L mg}^{-1}$ ) and  $B_1$  is related to the heat of adsorption. A plot of  $q_e$  versus  $\ln C_e$  yields a straight line from which the isotherm constants  $B_1$  and  $K_T$  can be determined.

**Table S1.** Thermodynamic parameters for fluoride adsorption onto LDHs-n-MABs.

| $T$ (K) | $K_d$ | $\Delta G^0$ (KJ/mol) | $\Delta S^0$ (J/mol $\text{K}^{-1}$ ) | $\Delta H^0$ (KJ/mol) |
|---------|-------|-----------------------|---------------------------------------|-----------------------|
| 293     | 11.01 | -5.844                | -138.45                               | -46.185               |
| 313     | 2.42  | -2.297                |                                       |                       |
| 333     | 1.15  | -0.375                |                                       |                       |

**Table S2.** Mg/Al/Fe in the LDHs-n-MABs. (Unit: mg/ (mg adsorbent))

| Adsorbents                             | Mg    | Al    | Fe    |
|----------------------------------------|-------|-------|-------|
| Adsorbent before adsorption            | 0.115 | 0.058 | 0.021 |
| Adsorbent after adsorption             | 0.113 | 0.053 | 0.022 |
| Adsorbent after one cycle regeneration | 0.116 | 0.057 | 0.023 |

**Table S3.** Physio-chemical parameters of real groundwater

| Parameter            | Value |
|----------------------|-------|
| pH                   | 8.52  |
| Fluoride, mg/L       | 3.02  |
| Total organic carbon | 22.23 |
| Total hardness       | 0.108 |
| Chloride, mg/L       | 119.6 |
| Nitrate, mg/L        | 10.76 |
| Sulfite, mg/L        | 4.74  |
| Sodium, mg/L         | 395.2 |
| Potassium, mg/L      | 2.46  |
| Total iron, mg/L     | 0.25  |
| Manganese, mg/L      | 0.02  |
| Calcium, mg/L        | 3.24  |
| Magnesium, mg/L      | 7.92  |
| Zinc, mg/L           | 0.02  |
| Alumina, mg/L        | 0.12  |

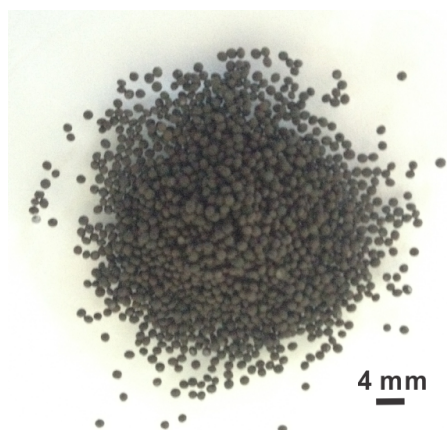

**Fig. S1.** Photograph of the dry beads.

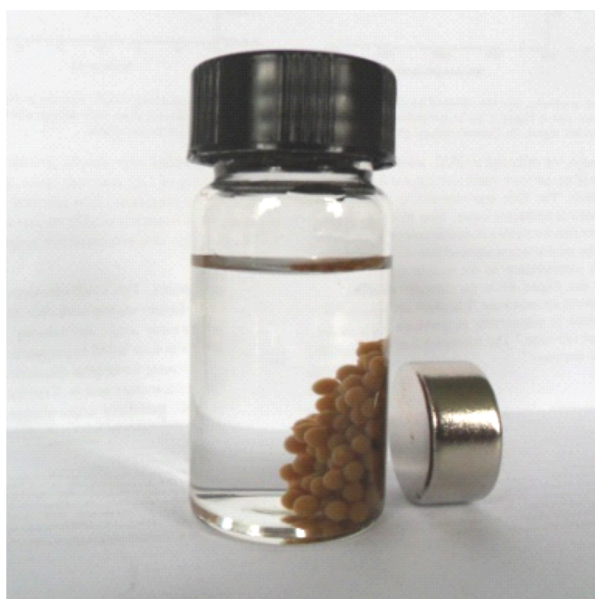

**Fig. S2.** Photograph for the magnetic separation of the beads from solution under an external magnetic field.

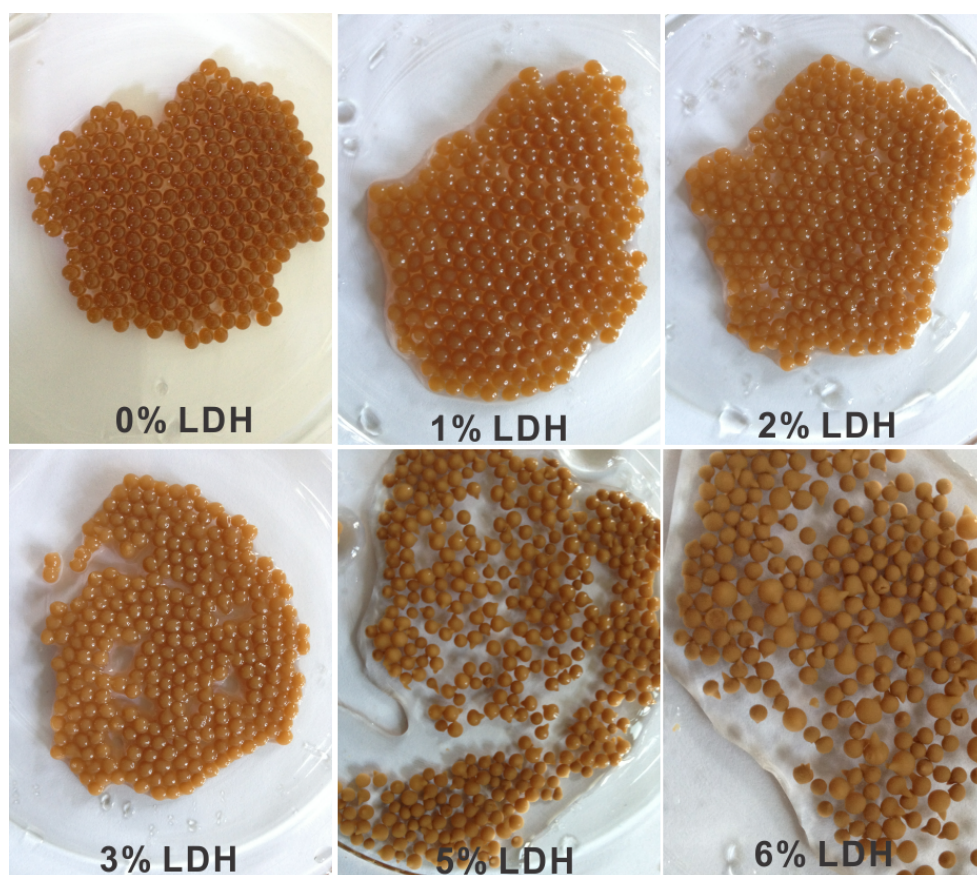

**Fig. S3.** Photograph for the beads with different content of LDHs.

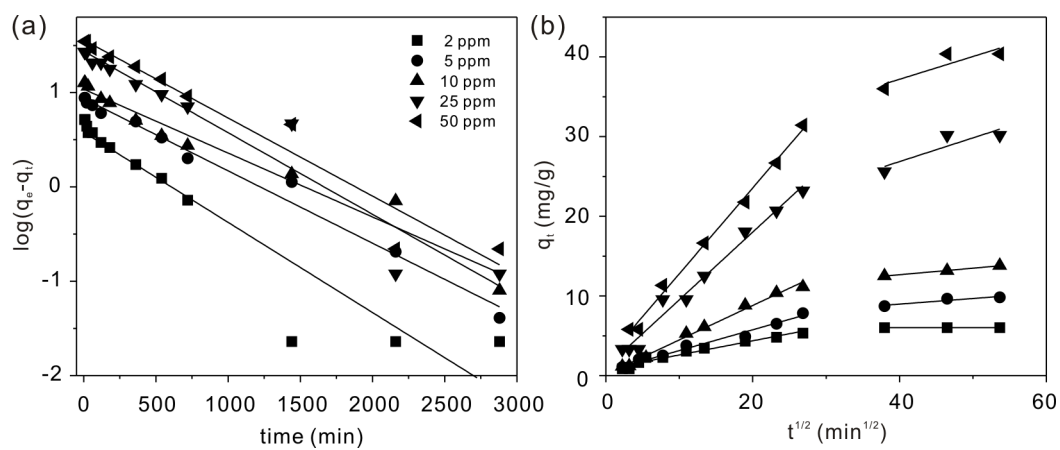

**Fig. S4.** The pseudo-first-order kinetic (a) and intra-particle (b) model fitting of the adsorption kinetics studies demonstrated in Figure 4(a).

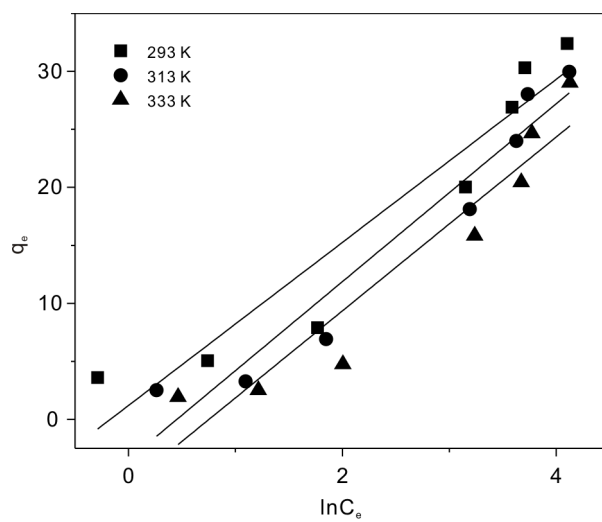

**Fig. S5.** Temkin isotherm fitting results of fluoride adsorption onto LDHs-n-MABs.

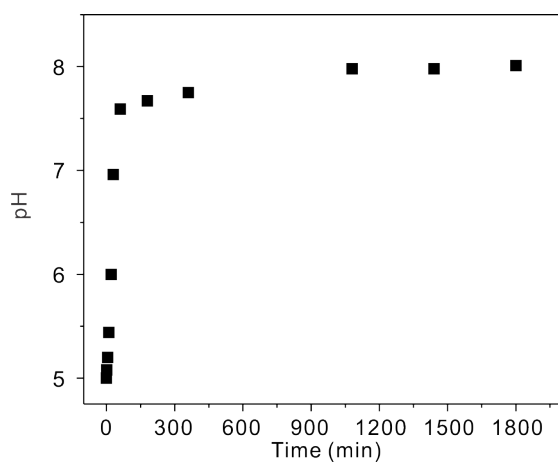

**Fig. S6.** pH variation during the adsorption.
